# Supplementary material for: Interaction preferences between nucleobase mimetics and amino acids in aqueous solutions
Source: Royal Society of Chemistry journal article supplement (doi:10.1039/c5cp01486g), 2015-01-01
Supplement: c5cp01486g1.pdf [file c5cp01486g1.pdf]

**Table S5. List of all relative interaction free energy scales, interaction propensity scales and contact coefficients derived in this study.**

Sidechain analog relative free energy for different nitrogenous bases

|     | DMP   | PYR <sup>u</sup> | PYR <sup>u*</sup> | PUR <sup>u</sup> | PUR <sup>u*</sup> |
|-----|-------|------------------|-------------------|------------------|-------------------|
| ala | -6.54 | -2.07            | -2.24             | -3.52            | -3.24             |
| arg | 1.21  | -1.64            | -1.38             | 0.57             | -1.09             |
| asn | -1.34 | -3.23            | -3.46             | -2.96            | -3.82             |
| asp | 2.20  | -2.58            | -2.84             | -0.39            | -1.48             |
| cys | -4.90 | -3.34            | -3.70             | -5.48            | -4.70             |
| gln | -1.91 | -3.03            | -3.29             | -3.56            | -3.79             |
| glu | 1.20  | -2.98            | -2.97             | -0.92            | -1.98             |
| gly | -     | -                | -                 | -                | -                 |
| his | -0.51 | -2.06            | -2.05             | -2.44            | -2.60             |
| ile | -8.52 | -2.35            | -2.44             | -5.35            | -4.05             |
| leu | -8.61 | -2.41            | -2.43             | -5.00            | -3.85             |
| lys | -0.50 | -1.74            | -1.34             | -0.17            | -0.99             |
| met | -5.06 | -2.86            | -3.37             | -5.36            | -4.45             |
| phe | -7.60 | -2.45            | -3.02             | -5.39            | -4.61             |
| pro | -     | -                | -                 | -                | -                 |
| ser | -0.27 | -2.01            | -2.00             | -1.20            | -2.06             |
| thr | -1.55 | -1.87            | -1.97             | -2.25            | -2.27             |
| trp | -4.85 | -5.77            | -6.07             | -5.74            | -5.04             |
| tyr | -3.73 | -2.49            | -2.83             | -5.24            | -4.20             |
| val | -8.02 | -2.16            | -2.53             | -4.66            | -3.90             |

\*sidechain analog interaction propensities derived from mixed systems,  
where both PUR<sup>u</sup> and PYR<sup>u</sup> molecules were present at the same time

Sidechain analog interaction propensity scales for  
different nitrogenous bases

|     | DMP    | SEM <sub>DMP_sca</sub> | PYR <sup>u</sup> | SEM <sub>PYRu_sca</sub> | PYR <sup>u*</sup> | SEM <sub>PYRu*_sca</sub> | PUR <sup>u</sup> | SEM <sub>PURu_sca</sub> | PUR <sup>u*</sup> | SEM <sub>PURu*_sca</sub> |
|-----|--------|------------------------|------------------|-------------------------|-------------------|--------------------------|------------------|-------------------------|-------------------|--------------------------|
| ala | -11.96 | 0.06                   | 0.24             | 0.05                    | 3.24              | 0.04                     | -5.75            | 0.09                    | 1.72              | 0.06                     |
| arg | 85.46  | 0.26                   | 12.84            | 0.38                    | 48.50             | 0.34                     | 70.03            | 0.29                    | 61.85             | 0.29                     |
| asn | 66.14  | 0.31                   | 25.43            | 0.38                    | 37.39             | 0.38                     | 29.60            | 0.41                    | 42.75             | 0.36                     |
| asp | 265.08 | 0.35                   | 89.66            | 0.55                    | 123.55            | 0.60                     | 178.90           | 0.63                    | 147.34            | 0.61                     |
| cys | -14.93 | 0.17                   | -0.45            | 0.16                    | 7.00              | 0.15                     | -24.21           | 0.19                    | 3.20              | 0.16                     |
| gln | 59.92  | 0.32                   | 24.66            | 0.39                    | 38.55             | 0.38                     | 13.59            | 0.43                    | 42.56             | 0.37                     |
| glu | 259.35 | 0.36                   | 82.98            | 0.54                    | 121.20            | 0.59                     | 162.16           | 0.67                    | 142.63            | 0.60                     |
| gly | -      | -                      | -                | -                       | -                 | -                        | -                | -                       | -                 | -                        |
| his | 81.43  | 0.28                   | 42.30            | 0.34                    | 62.44             | 0.32                     | 36.20            | 0.39                    | 61.70             | 0.33                     |
| ile | -36.88 | 0.09                   | -1.06            | 0.09                    | 6.72              | 0.09                     | -31.31           | 0.17                    | -1.32             | 0.14                     |
| leu | -35.90 | 0.09                   | -1.10            | 0.09                    | 7.16              | 0.09                     | -28.08           | 0.17                    | 0.58              | 0.13                     |
| lys | 110.91 | 0.28                   | 38.58            | 0.49                    | 80.44             | 0.42                     | 103.67           | 0.30                    | 97.02             | 0.36                     |
| met | -24.51 | 0.18                   | 2.59             | 0.16                    | 11.71             | 0.15                     | -35.76           | 0.22                    | 2.77              | 0.20                     |
| phe | -50.09 | 0.13                   | -4.93            | 0.14                    | 4.95              | 0.14                     | -48.23           | 0.20                    | -6.59             | 0.19                     |
| pro | -      | -                      | -                | -                       | -                 | -                        | -                | -                       | -                 | -                        |
| ser | 56.30  | 0.24                   | 34.68            | 0.28                    | 43.96             | 0.28                     | 40.92            | 0.30                    | 45.50             | 0.27                     |
| thr | 47.35  | 0.26                   | 34.00            | 0.28                    | 43.30             | 0.28                     | 28.72            | 0.33                    | 44.42             | 0.28                     |
| trp | -34.77 | 0.28                   | -12.93           | 0.26                    | 4.85              | 0.25                     | -70.86           | 0.30                    | -7.09             | 0.30                     |
| tyr | 19.12  | 0.27                   | 26.01            | 0.31                    | 38.13             | 0.31                     | -33.60           | 0.39                    | 28.42             | 0.33                     |
| val | -29.08 | 0.08                   | 0.33             | 0.07                    | 5.47              | 0.08                     | -20.83           | 0.15                    | -0.05             | 0.12                     |

\*sidechain analog interaction propensities derived from mixed systems,  
where both PURu and PYRu molecules were present at the same time

Sidechain analog contact coefficient scales for  
different nitrogenous bases

|     | DMP  | PYR <sup>u</sup> | PYR <sup>u*</sup> | PUR <sup>u</sup> | PUR <sup>u*</sup> | PUR <sup>u</sup> :PYR <sup>u*</sup> |
|-----|------|------------------|-------------------|------------------|-------------------|-------------------------------------|
| ala | 2.59 | 0.64             | 0.66              | 0.88             | 0.78              | 1.19                                |
| arg | 0.07 | 0.88             | 0.78              | 0.22             | 0.44              | 0.56                                |
| asn | 0.29 | 1.13             | 1.28              | 0.79             | 1.04              | 0.81                                |
| asp | 0.05 | 1.02             | 1.13              | 0.28             | 0.47              | 0.42                                |
| cys | 1.49 | 1.03             | 1.17              | 2.21             | 1.49              | 1.27                                |
| gln | 0.34 | 1.11             | 1.27              | 1.03             | 1.07              | 0.84                                |
| glu | 0.07 | 1.04             | 1.12              | 0.35             | 0.53              | 0.47                                |
| gly | -    | -                | -                 | -                | -                 | -                                   |
| his | 0.23 | 0.69             | 0.66              | 0.70             | 0.74              | 1.13                                |
| ile | 6.58 | 0.83             | 0.86              | 2.02             | 1.22              | 1.41                                |
| leu | 7.07 | 0.82             | 0.84              | 1.81             | 1.10              | 1.31                                |
| lys | 0.06 | 0.89             | 0.70              | 0.14             | 0.22              | 0.31                                |
| met | 1.44 | 0.84             | 0.96              | 1.88             | 1.31              | 1.37                                |
| phe | 5.65 | 0.94             | 1.17              | 2.65             | 1.83              | 1.57                                |
| pro | -    | -                | -                 | -                | -                 | -                                   |
| ser | 0.16 | 0.64             | 0.62              | 0.37             | 0.49              | 0.79                                |
| thr | 0.22 | 0.64             | 0.65              | 0.54             | 0.52              | 0.80                                |
| trp | 1.93 | 1.21             | 1.52              | 3.07             | 2.18              | 1.43                                |
| tyr | 0.85 | 0.86             | 1.00              | 2.02             | 1.37              | 1.37                                |
| val | 5.37 | 0.75             | 0.85              | 1.50             | 1.12              | 1.32                                |

\*sidechain analog contact coefficients derived from mixed systems,  
where both PUR<sup>u</sup> and PYR<sup>u</sup> molecules were present at the same time

## Amino acid relative free energy for different nitrogenous bases

|     | DMP   | PYR <sup>u</sup> | PYR <sup>u*</sup> | PUR <sup>u</sup> | PUR <sup>u*</sup> |
|-----|-------|------------------|-------------------|------------------|-------------------|
| ala | 3.16  | -3.60            | -3.65             | -0.06            | -2.23             |
| arg | 5.12  | -2.14            | -1.79             | 1.10             | 0.07              |
| asn | 2.94  | -3.36            | -3.35             | -1.77            | -2.90             |
| asp | 5.45  | -3.19            | -3.32             | -0.08            | -2.00             |
| cys | 1.32  | -3.28            | -3.49             | -1.06            | -2.62             |
| gln | 2.27  | -2.77            | -3.16             | -0.76            | -2.73             |
| glu | 4.92  | -2.81            | -3.06             | -0.16            | -1.47             |
| gly | 4.57  | -3.54            | -3.88             | -1.05            | -2.73             |
| his | 2.28  | -2.82            | -2.96             | -1.53            | -2.91             |
| ile | 0.38  | -3.04            | -3.36             | -1.26            | -2.13             |
| leu | 0.05  | -3.02            | -3.09             | -1.30            | -2.03             |
| lys | 5.50  | -2.47            | -1.98             | 1.09             | -0.84             |
| met | 0.46  | -2.81            | -3.19             | -1.91            | -3.17             |
| phe | -0.61 | -3.18            | -3.53             | -2.47            | -3.77             |
| pro | 1.50  | -2.86            | -3.22             | -1.36            | -2.71             |
| ser | 3.89  | -3.28            | -3.43             | -0.42            | -2.48             |
| thr | 2.20  | -3.37            | -3.44             | -1.66            | -2.51             |
| trp | -1.14 | -4.42            | -5.01             | -3.69            | -3.94             |
| tyr | 0.27  | -2.84            | -2.98             | -2.71            | -3.38             |
| val | 0.91  | -3.13            | -2.97             | -1.17            | -1.36             |

\*amino acid relative free energies derived from mixed systems,  
 where both PUR<sup>u</sup> and PYR<sup>u</sup> molecules were present at the same time

## Amino acid interaction propensity scales for different nitrogenous bases

|     | DMP    | SEM <sub>DMP_aa</sub> | PYR <sup>u</sup> | SEM <sub>PYRu_aa</sub> | PYR <sup>u*</sup> | SEM <sub>PYRu*_aa</sub> | PUR <sup>u</sup> | SEM <sub>PURu_aa</sub> | PUR <sup>u*</sup> | SEM <sub>PURu*_aa</sub> |
|-----|--------|-----------------------|------------------|------------------------|-------------------|-------------------------|------------------|------------------------|-------------------|-------------------------|
| ala | 279.47 | 0.41                  | 56.25            | 0.66                   | 108.97            | 0.70                    | 205.55           | 0.69                   | 148.13            | 0.66                    |
| arg | 381.31 | 0.45                  | 75.17            | 0.74                   | 174.87            | 0.74                    | 267.11           | 0.76                   | 232.27            | 0.69                    |
| asn | 341.22 | 0.54                  | 44.35            | 0.77                   | 113.14            | 0.85                    | 153.22           | 0.99                   | 154.74            | 0.82                    |
| asp | 506.78 | 0.55                  | 94.27            | 0.85                   | 174.85            | 0.96                    | 327.24           | 1.03                   | 243.80            | 0.93                    |
| cys | 270.04 | 0.47                  | 39.39            | 0.66                   | 89.99             | 0.72                    | 170.68           | 0.71                   | 134.15            | 0.69                    |
| gln | 358.16 | 0.53                  | 73.30            | 0.77                   | 117.29            | 0.83                    | 219.32           | 0.91                   | 167.62            | 0.79                    |
| glu | 546.18 | 0.64                  | 124.51           | 0.89                   | 210.38            | 0.96                    | 342.71           | 1.25                   | 284.32            | 0.94                    |
| gly | 288.63 | 0.40                  | 55.51            | 0.68                   | 96.82             | 0.75                    | 178.37           | 0.81                   | 137.52            | 0.72                    |
| his | 324.31 | 0.54                  | 63.44            | 0.73                   | 119.44            | 0.78                    | 163.77           | 0.86                   | 153.49            | 0.77                    |
| ile | 257.62 | 0.43                  | 56.03            | 0.64                   | 101.25            | 0.70                    | 157.51           | 0.76                   | 143.27            | 0.67                    |
| leu | 249.47 | 0.43                  | 49.99            | 0.65                   | 103.86            | 0.66                    | 155.00           | 0.77                   | 146.65            | 0.64                    |
| lys | 416.27 | 0.47                  | 79.47            | 0.86                   | 195.39            | 0.85                    | 308.76           | 0.76                   | 252.84            | 0.78                    |
| met | 256.19 | 0.47                  | 46.30            | 0.66                   | 86.93             | 0.78                    | 122.04           | 0.80                   | 114.97            | 0.78                    |
| phe | 242.00 | 0.44                  | 31.70            | 0.68                   | 82.62             | 0.70                    | 130.90           | 0.71                   | 116.18            | 0.69                    |
| pro | 244.33 | 0.40                  | 65.67            | 0.57                   | 96.62             | 0.63                    | 136.73           | 0.71                   | 119.20            | 0.63                    |
| ser | 300.66 | 0.46                  | 56.27            | 0.70                   | 105.15            | 0.76                    | 194.94           | 0.76                   | 145.51            | 0.73                    |
| thr | 281.06 | 0.48                  | 47.38            | 0.66                   | 100.30            | 0.73                    | 139.59           | 0.86                   | 140.26            | 0.71                    |
| trp | 257.45 | 0.48                  | 15.71            | 0.68                   | 79.52             | 0.73                    | 93.55            | 0.76                   | 121.00            | 0.72                    |
| tyr | 317.55 | 0.48                  | 63.89            | 0.71                   | 126.13            | 0.78                    | 125.26           | 0.87                   | 168.09            | 0.74                    |
| val | 262.27 | 0.42                  | 61.70            | 0.65                   | 124.25            | 0.68                    | 160.08           | 0.69                   | 163.20            | 0.65                    |

\*amino acid interaction propensities derived from mixed systems,  
where both PURu and PYRu molecules were present at the same time

Amino acid contact coefficient scales for  
different nitrogenous bases

|     | DMP  | PYR <sup>u</sup> | PYR <sup>u*</sup> | PUR <sup>u</sup> | PUR <sup>u*</sup> | PUR <sup>u</sup> :PYR <sup>u*</sup> |
|-----|------|------------------|-------------------|------------------|-------------------|-------------------------------------|
| ala | 0.03 | 1.48             | 1.52              | 0.22             | 0.51              | 0.34                                |
| arg | 0.02 | 1.10             | 0.97              | 0.21             | 0.32              | 0.33                                |
| asn | 0.07 | 1.74             | 1.75              | 0.62             | 0.90              | 0.52                                |
| asp | 0.02 | 1.72             | 1.81              | 0.33             | 0.58              | 0.32                                |
| cys | 0.09 | 1.64             | 1.84              | 0.43             | 0.75              | 0.41                                |
| gln | 0.08 | 1.45             | 1.81              | 0.42             | 0.86              | 0.48                                |
| glu | 0.02 | 1.48             | 1.57              | 0.32             | 0.51              | 0.32                                |
| gly | 0.02 | 1.52             | 1.73              | 0.31             | 0.62              | 0.36                                |
| his | 0.09 | 1.25             | 1.39              | 0.56             | 0.89              | 0.64                                |
| ile | 0.07 | 1.44             | 1.64              | 0.38             | 0.55              | 0.33                                |
| leu | 0.09 | 1.49             | 1.65              | 0.40             | 0.53              | 0.32                                |
| lys | 0.01 | 1.37             | 1.11              | 0.17             | 0.30              | 0.27                                |
| met | 0.09 | 1.49             | 1.82              | 0.57             | 0.90              | 0.49                                |
| phe | 0.36 | 1.41             | 1.78              | 0.83             | 1.32              | 0.74                                |
| pro | 0.05 | 1.15             | 1.38              | 0.39             | 0.67              | 0.49                                |
| ser | 0.03 | 1.52             | 1.66              | 0.31             | 0.65              | 0.39                                |
| thr | 0.06 | 1.60             | 1.66              | 0.54             | 0.67              | 0.41                                |
| trp | 0.36 | 1.61             | 1.93              | 1.22             | 1.36              | 0.70                                |
| tyr | 0.18 | 1.31             | 1.44              | 0.81             | 0.85              | 0.59                                |
| val | 0.06 | 1.37             | 1.32              | 0.37             | 0.40              | 0.30                                |

\*amino acid contact coefficients derived from mixed systems,  
where both PUR<sup>u</sup> and PYR<sup>u</sup> molecules were present at the same time
